# Supplementary material
Source: PubMed Central journal article supplement (PMC8129730)

# Quantitative Emphysema on Low-Dose CT Imaging of the Chest and Risk of Lung Cancer and Airflow Obstruction

## An Analysis of the National Lung Screening Trial

*Wassim W. Labaki, MD; Meng Xia, PhD; Susan Murray, ScD; Charles R. Hatt, PhD; Abdullah Al-Abcha, MD; Michael C. Ferrera, MD; Catherine A. Meldrum, PhD, RN; Lauren A. Keith, PhD; Craig J. Galbán, PhD; Douglas A. Arenberg, MD; Jeffrey L. Curtis, MD; Fernando J. Martinez, MD; Ella A. Kazerooni, MD; and MeiLan K. Han, MD*

CHEST 2021; 159(5):1812-1820

*Online supplements are not copyedited prior to posting and the author(s) take full responsibility for the accuracy of all data.*

**e-Table 1. Multivariable Cox Regression Model of Lung Cancer Mortality**

|                                                  | Hazard Ratio (95% CI) | p-value |
|--------------------------------------------------|-----------------------|---------|
| Age (per 1-yr increase)                          | 1.08 (1.04-1.13)      | <0.001  |
| Body mass index <sup>#</sup>                     |                       |         |
| • Linear term                                    | 0.99 (0.94-1.04)      | 0.61    |
| • Quadratic term                                 | 1.00 (1.00-1.00)      | 0.78    |
| Smoking pack-years (per 1-unit increase)         | 1.01 (1.01-1.02)      | <0.001  |
| Time since smoking cessation (per 1-yr increase) | 0.87 (0.82-0.93)      | <0.001  |
| Family history of lung cancer (yes vs. no)       | 1.57 (1.02-2.43)      | 0.042   |
| %LAA (per 1% increase)*                          | 1.02 (1.00-1.05)      | 0.045   |

<sup>#</sup> Body mass index is centered on the mean (28.0 kg/m<sup>2</sup>) to avoid collinearity between linear and quadratic terms

\* %LAA: % low attenuation area (defined as the percent of lung volume with voxels < -950 Hounsfield Units on computed tomography of the chest)

**e-Table 2. Multivariable Cox Regression Model of All-Cause Mortality**

|                                                  | Hazard Ratio (95% CI)  | p-value |
|--------------------------------------------------|------------------------|---------|
| Age (per 1-yr increase)                          | 1.09 (1.07-1.11)       | <0.001  |
| Female (vs. male)                                | 0.70 (0.57-0.87)       | 0.001   |
| Race and ethnicity                               |                        |         |
| • Non-Hispanic White                             | 1.00 [reference group] |         |
| • Non-Hispanic Black                             | 2.34 (1.67-3.29)       | <0.001  |
| • Hispanic or other                              | 0.68 (0.37-1.25)       | 0.22    |
| Body mass index <sup>#</sup>                     |                        |         |
| • Linear term                                    | 1.00 (0.98-1.02)       | 0.88    |
| • Quadratic term                                 | 1.00 (1.00-1.00)       | 0.02    |
| Smoking pack-years (per 1-unit increase)         | 1.01 (1.01-1.01)       | <0.001  |
| Time since smoking cessation (per 1-yr increase) | 0.96 (0.94-0.98)       | <0.001  |
| Family history of lung cancer (yes vs. no)       | 1.17 (0.94-1.46)       | 0.16    |
| %LAA (per 1% increase)*                          | 1.01 (1.00-1.03)       | 0.042   |

<sup>#</sup> Body mass index is centered on the mean (28.0 kg/m<sup>2</sup>) to avoid collinearity between linear and quadratic terms

\* %LAA: % low attenuation area (defined as the percent of lung volume with voxels < -950 Hounsfield Units on computed tomography of the chest)

**e-Table 3. Airflow obstruction on spirometry by %LAA group (> 1% vs. ≤ 1%) in different age and sex subgroups**

| <b>FEMALE &lt; 65 YEARS</b> |                                     |                                  |              |                                            |
|-----------------------------|-------------------------------------|----------------------------------|--------------|--------------------------------------------|
|                             | <b>FEV<sub>1</sub>/FVC &lt; 0.7</b> | <b>FEV<sub>1</sub>/FVC ≥ 0.7</b> | <b>Total</b> |                                            |
|                             |                                     |                                  |              | Sensitivity 50.8%<br>(95% CI 44.5%- 57.2%) |
| <b>%LAA &gt; 1%</b>         | <b>120</b>                          | <b>124</b>                       | <b>244</b>   | Specificity 81.9%<br>(95% CI 79.0%-84.8%)  |
| <b>% LAA ≤ 1%</b>           | <b>116</b>                          | <b>561</b>                       | <b>677</b>   | PPV 49.2%<br>(95% CI 42.9%-55.5%)          |
| <b>Total</b>                | <b>236</b>                          | <b>685</b>                       | <b>921</b>   | NPV 82.9%<br>(95% CI 80.0%-85.7%)          |
| <b>FEMALE ≥ 65 YEARS</b>    |                                     |                                  |              |                                            |
|                             | <b>FEV<sub>1</sub>/FVC &lt; 0.7</b> | <b>FEV<sub>1</sub>/FVC ≥ 0.7</b> | <b>Total</b> |                                            |
|                             |                                     |                                  |              | Sensitivity 65.3%<br>(95% CI 56.8%-73.8%)  |
| <b>%LAA &gt; 1%</b>         | <b>79</b>                           | <b>57</b>                        | <b>136</b>   | Specificity 72.6%<br>(95% CI 66.5%-78.7%)  |
| <b>% LAA ≤ 1%</b>           | <b>42</b>                           | <b>151</b>                       | <b>193</b>   | PPV 58.1%<br>(95% CI 49.8%-66.4%)          |
| <b>Total</b>                | <b>121</b>                          | <b>208</b>                       | <b>329</b>   | NPV 78.2%<br>(95% CI 72.4%-84.1%)          |
| <b>MALE &lt; 65 YEARS</b>   |                                     |                                  |              |                                            |
|                             | <b>FEV<sub>1</sub>/FVC &lt; 0.7</b> | <b>FEV<sub>1</sub>/FVC ≥ 0.7</b> | <b>Total</b> |                                            |
|                             |                                     |                                  |              | Sensitivity 61.6%<br>(95% CI 56.4%-66.7%)  |
| <b>%LAA &gt; 1%</b>         | <b>210</b>                          | <b>183</b>                       | <b>393</b>   | Specificity 72.5%<br>(95% CI 69.1%-75.9%)  |
| <b>% LAA ≤ 1%</b>           | <b>131</b>                          | <b>483</b>                       | <b>614</b>   | PPV 53.4%<br>(95% CI 48.5%-58.4%)          |
| <b>Total</b>                | <b>341</b>                          | <b>666</b>                       | <b>1007</b>  | NPV 78.7%<br>(95% CI 75.4%-81.9%)          |
| <b>MALE ≥ 65 YEARS</b>      |                                     |                                  |              |                                            |
|                             | <b>FEV<sub>1</sub>/FVC &lt; 0.7</b> | <b>FEV<sub>1</sub>/FVC ≥ 0.7</b> | <b>Total</b> |                                            |
|                             |                                     |                                  |              | Sensitivity 74.2%<br>(95% CI 56.4%-66.7%)  |
| <b>%LAA &gt; 1%</b>         | <b>144</b>                          | <b>85</b>                        | <b>229</b>   | Specificity 65.9%<br>(95% CI 60.0%-71.8%)  |
| <b>% LAA ≤ 1%</b>           | <b>50</b>                           | <b>164</b>                       | <b>214</b>   | PPV 62.9%<br>(95% CI 56.6%-69.1%)          |
| <b>Total</b>                | <b>194</b>                          | <b>249</b>                       | <b>443</b>   | NPV 76.6%<br>(95% CI 71.0%-82.3%)          |

%LAA: % low attenuation area (defined as the percent of lung volume with voxels < -950 Hounsfield Units on computed tomography of the chest); FEV<sub>1</sub>: forced expiratory volume in the first second; FVC: forced vital capacity; CI: confidence intervals; PPV: positive predictive value; NPV: negative predictive value.

*Online supplements are not copyedited prior to posting and the author(s) take full responsibility for the accuracy of all data.*

**e-Table 4. Associations between each of %LAA and FEV<sub>1</sub>/FVC < 0.7 with lung cancer incidence, lung cancer mortality and all-cause mortality in multivariable Cox regression models**

| Outcome               | %LAA*                         | FEV <sub>1</sub> /FVC < 0.7 <sup>^</sup> |
|-----------------------|-------------------------------|------------------------------------------|
| Lung cancer incidence | HR 1.01 (1.00-1.03)<br>p=0.14 | HR 1.17 (0.85-1.60)<br>p=0.33            |
| Lung cancer mortality | HR 1.01 (0.98-1.04)<br>p=0.64 | HR 1.77 (1.03-3.05)<br>p=0.04            |
| All-cause mortality   | HR 1.00 (0.98-1.02)<br>p=0.83 | HR 1.25 (0.91-1.72)<br>p=0.16            |

%LAA: % low attenuation area (defined as the percent of lung volume with voxels < -950 Hounsfield Units on computed tomography of the chest); FEV<sub>1</sub>: forced expiratory volume in the first second; FVC: forced vital capacity; HR: hazard ratio

\*Cells represent hazard ratios with 95% confidence intervals and associated p-values for 1% increase in %LAA after adjustment for covariates.

<sup>^</sup>Cells represent hazard ratios with 95% confidence intervals and associated p-values for FEV<sub>1</sub>/FVC < 0.7 (compared to FEV<sub>1</sub>/FVC ≥ 0.7) after adjustment for covariates.

**e-Figure 1. Consort Diagram**

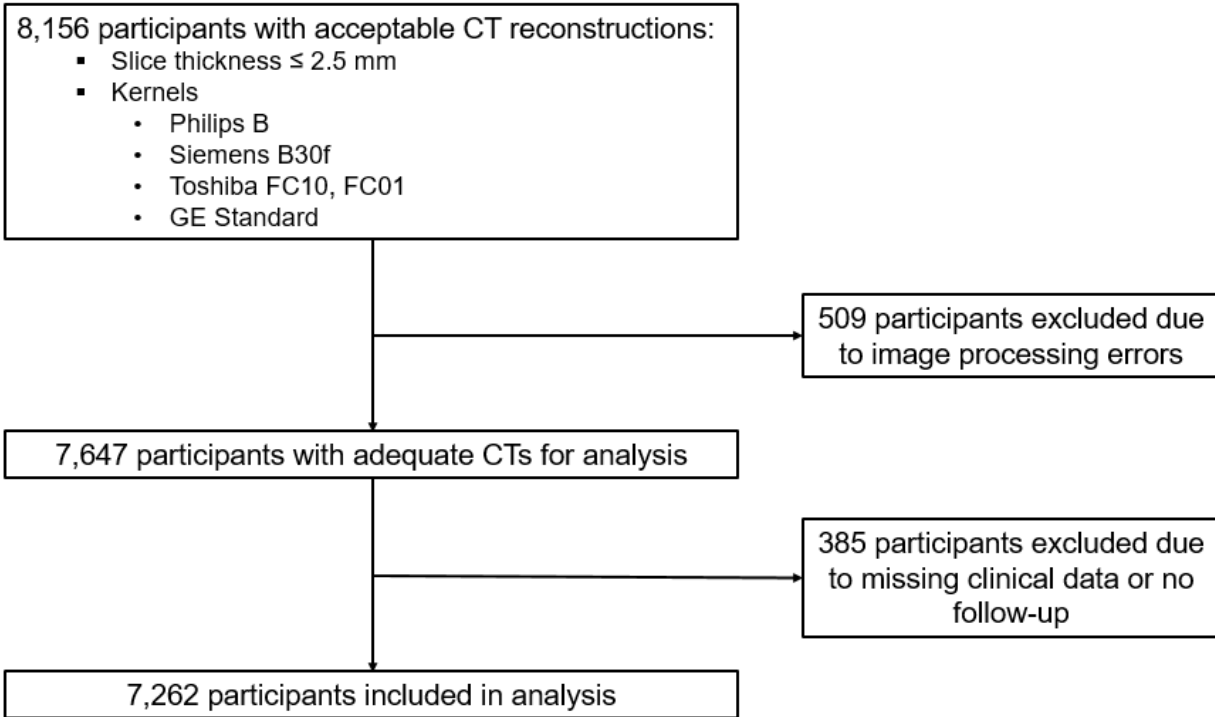

e-Figure 2. Histograms of %LAA in participants with and without airflow obstruction

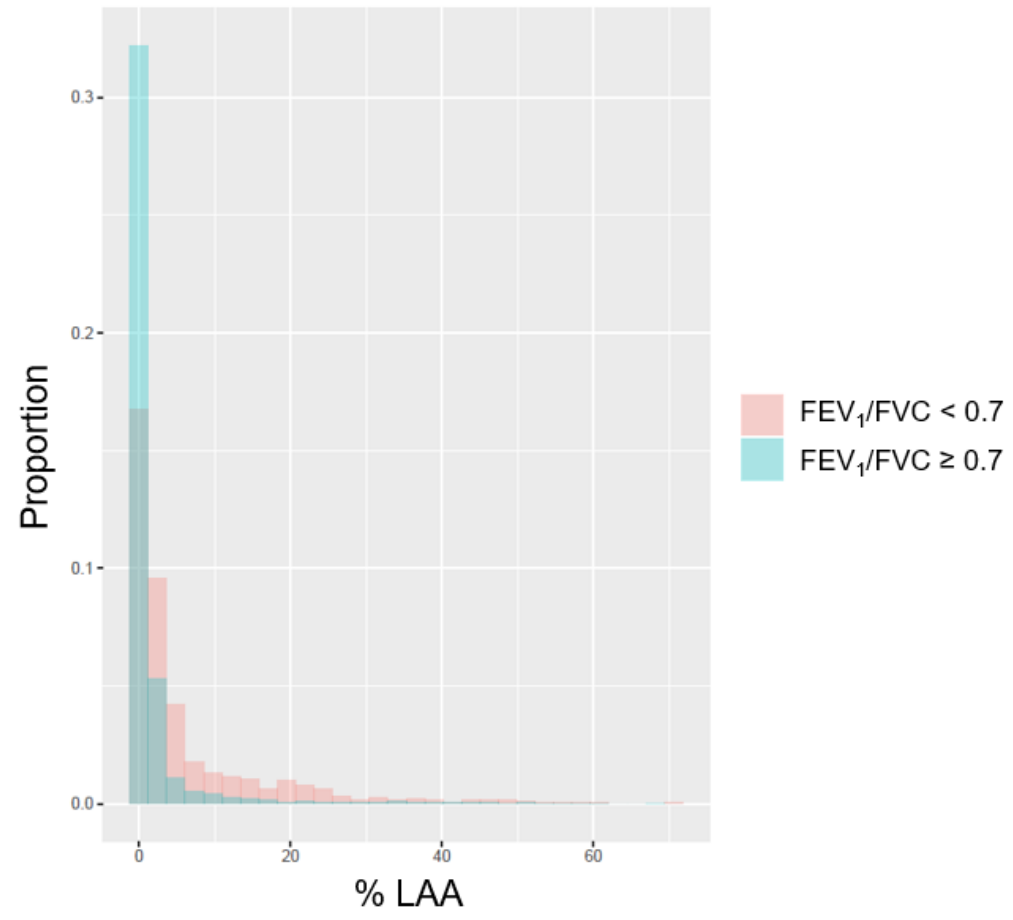

Supplement: mmc1.pdf [file mmc1.pdf]
